# Supplementary material for: Projecting of wave height and water level on reef-lined coasts due to intensified tropical cyclones and sea level rise in Palau to 2100
Source: Copernicus journal article supplement (doi:10.5194/nhess-18-669-2018), 2018-03-02
Supplement: Supplementary file 1 [file nhess-18-669-2018-supplement.zip]

Archive with 4 entries (3 files):
- Table S1 and S2/
- Table S1 and S2/Table S1.xlsx
- Table S1 and S2/Table S2.xlsx
- nhess-18-669-2018-supplement-title-page.pdf
