# Supplementary material for: Projecting of wave height and water level on reef-lined coasts due to intensified tropical cyclones and sea level rise in Palau to 2100
Source: Copernicus journal article supplement (doi:10.5194/nhess-18-669-2018), 2018-03-02
Supplement: Supplementary file 1 [file nhess-18-669-2018-supplement.zip › nhess-18-669-2018-supplement-title-page.pdf]

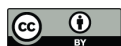

## *Supplement of*

# **Projecting of wave height and water level on reef-lined coasts due to intensified tropical cyclones and sea level rise in Palau to 2100**

**Chuki Hongo et al.**

*Correspondence to:* Chuki Hongo ([g123001@sci.u-ryukyu.ac.jp](mailto:g123001@sci.u-ryukyu.ac.jp))

- [nhess-18-669-2018-supplement-title-page.pdf](#)
- Table S1 and S2
  - Table S1.xlsx
  - Table S2.xlsx

The copyright of individual parts of the supplement might differ from the CC BY 3.0 License.
