# Supplementary material for: Projecting of wave height and water level on reef-lined coasts due to intensified tropical cyclones and sea level rise in Palau to 2100
Source: Copernicus journal article supplement (doi:10.5194/nhess-18-669-2018), 2018-03-02
Supplement: Supplementary file 1 [file nhess-18-669-2018-supplement.zip › Table S1 and S2/Table S1.xlsx]

## Sheet: Supple Table 1
Table S1 Effects of intensification of tropical cyclones, and increased sea level rise and storm surges on wave height on the reef flat at the study site.
Case	SWHo (m)	SWPo (s)	SLR (m)	Storm surge (m)	SWHr at degraded reef (m)	Effect of increasing of intensity of tropical cyclone to SWHr at degraded reef (%)*	SWHr at healthy reef (m)	Effect of increasing of intensity of tropical cyclone to SWHr at healthy reef (%)*
Effect of increasing of intensity of tropical cyclone
2	8.7	13	0.24	0	1.11		0.88
4	10	14			1.45	0.306306	1.21	0.375
6	11	15			1.31	0.18018	1.49	0.693182
16	8.7	13	0.24	1	1.37		1.22
18	10	14			1.57	0.145985	1.52	0.245902
20	11	15			1.93	0.408759	1.66	0.360656
3	8.7	13	0.3	0	0.97		1.09
5	10	14			1.51	0.556701	1.46	0.33945
7	11	15			1.53	0.57732	1.5	0.376147
17	8.7	13	0.3	1	1.33		1.35
19	10	14			1.67	0.255639	1.26	-0.0666667
21	11	15			2.14	0.609023	1.7	0.259259
8	8.7	13	0.44	0	1.07		1.06
11	10	14			1.54	0.439252	1.33	0.254717
13	11	15			1.63	0.523364	1.4	0.320755
22	8.7	13	0.44	1	1.32		1.21
25	10	14			1.87	0.416667	1.45	0.198347
27	11	15			1.97	0.492424	1.77	0.46281
9	8.7	13	0.74	0	1.34		1.11
12	10	14			1.48	0.104478	1.18	0.0630631
14	11	15			1.68	0.253731	1.77	0.594595
23	8.7	13	0.74	1	1.24		1.4
26	10	14			1.59	0.282258	1.64	0.171429
28	11	15			1.92	0.548387	1.66	0.185714
24	8.7	13	0.98	1	1.47		1.3
29	11	15			2	0.360544	1.8	0.384615
					Mean	0.38006	Mean	0.306998
					SD	0.159533	SD	0.181736
Case	SWHo (m)	SWPo (s)	SLR (m)	Storm surge (m)	SWHr at degraded reef (m)	Effect of sea-level rise to SWHr at degraded reef (%)*	SWHr at healthy reef (m)	Effect of sea-level rise to SWHr at healthy reef (%)*
Effect of sea level rise
1	8.7	13	0	0	-		1.05
2			0.24		1.11		0.88	-0.161905
3			0.3		0.97	-0.126126	1.09	0.0380952
8			0.44		1.07	-0.036036	1.06	0.00952381
9			0.74		1.34	0.207207	1.11	0.0571429
10			0.98		1.28	0.153153	1.12	0.0666667
15	8.7	13	0	1	-		1.24
16			0.24		1.37		1.22	-0.016129
17			0.3		1.33	-0.0291971	1.35	0.0887097
22			0.44		1.32	-0.0364964	1.21	-0.0241935
23			0.74		1.24	-0.0948905	1.4	0.129032
24			0.98		1.47	0.0729927	1.3	0.0483871
4	10	14	0.24	0	1.45		1.21
5			0.3		1.51	0.0413793	1.46	0.206612
11			0.44		1.54	0.062069	1.33	0.0991736
12			0.74		1.48	0.0206897	1.18	-0.0247934
18	10	14	0.24	1	1.57		1.52
19			0.3		1.67	0.0636943	1.26	-0.171053
25			0.44		1.87	0.191083	1.45	-0.0460526
26			0.74		1.59	0.0127389	1.64	0.0789474
6	11	15	0.24	0	1.31		1.49
7			0.3		1.53	0.167939	1.5	0.00671141
13			0.44		1.63	0.244275	1.4	-0.0604027
14			0.74		1.68	0.282443	1.77	0.187919
20	11	15	0.24	1	1.93		1.66
21			0.3		2.14	0.108808	1.7	0.0240964
27			0.44		1.97	0.0207254	1.77	0.0662651
28			0.74		1.92	-0.00518135	1.66	0
29			0.98		2	0.0362694	1.8	0.0843373
					Mean	0.0646447	Mean	0.0298735
					SD	0.109622	SD	0.0915739
Case	SWHo (m)	SWPo (s)	SLR (m)	Storm surge (m)	SWHr at degraded reef (m)	Effect of storm surge to SWHr at degraded reef (%)*	SWHr at healthy reef (m)	Effect of storm surge to SWHr at healthy reef (%)*
Effect of storm surge
1	8.7	13	0	0	-		1.05
15				1	-		1.24	0.180952
2	8.7	13	0.24	0	1.11		0.88
16				1	1.37	0.234234	1.22	0.386364
3	8.7	13	0.3	0	0.97		1.09
17				1	1.33	0.371134	1.35	0.238532
4	10	14	0.24	0	1.45		1.21
18				1	1.57	0.0827586	1.52	0.256198
5	10	14	0.3	0	1.51		1.46
19				1	1.67	0.10596	1.26	-0.136986
6	11	15	0.24	0	1.31		1.49
20				1	1.93	0.473282	1.66	0.114094
7	11	15	0.3	0	1.53		1.5
21				1	2.14	0.398693	1.7	0.133333
8	8.7	13	0.44	0	1.07		1.06
22				1	1.32	0.233645	1.21	0.141509
9	8.7	13	0.74	0	1.34		1.11
23				1	1.24	-0.0746269	1.4	0.261261
10	8.7	13	0.98	0	1.28		1.12
24				1	1.47	0.148437	1.3	0.160714
11	10	14	0.44	0	1.54		1.33
25				1	1.87	0.214286	1.45	0.0902256
12	10	14	0.74	0	1.48		1.18
26				1	1.59	0.0743243	1.64	0.389831
13	11	15	0.44	0	1.63		1.4
27				1	1.97	0.208589	1.77	0.264286
14	11	15	0.74	0	1.68		1.77
28				1	1.92	0.142857	1.66	-0.0621469
					Mean	0.201044	Mean	0.172726
					SD	0.148813	SD	0.147899
SWHo: significant wave height at outer ocean
SWPo: significant wave period at outer ocean
SLR: sea level rise, based on RCP scenarios 2.6 and 8.5 (Church et al., 2013)
SWHr: significant wave height at reef flat
The tide is 0.80 m above present mean sea level (i.e., high tide).
* The value is relative to a base value which is shown in bold
