# Supplementary material for: Projecting of wave height and water level on reef-lined coasts due to intensified tropical cyclones and sea level rise in Palau to 2100
Source: Copernicus journal article supplement (doi:10.5194/nhess-18-669-2018), 2018-03-02
Supplement: Supplementary file 1 [file nhess-18-669-2018-supplement.zip › Table S1 and S2/Table S2.xlsx]

## Sheet: Table S2
Table S2 Effects of intensification of tropical cyclones, and increased sea level rise and storm surges on water level at the shore at the study site.
Case	SWHo (m)	SWPo (s)	SLR (m)	Storm surge (m)	WLs at degraded reef (m)	Effect of increasing of intensity of tropical cyclone to WLs at degraded reef (%)*	WLs at healthy reef (m)	Effect of increasing of intensity of tropical cyclone to WLs at healthy reef (%)*
Effect of increasing of intensity of tropical cyclone
31	8.7	13	0.24	0	1.19		1.24
33	10	14			1.58	0.327731	1.55	0.25
35	11	15			1.87	0.571429	1.9	0.532258
45	8.7	13	0.24	1	2.3		2.29
47	10	14			2.44	0.0608696	2.53	0.104803
49	11	15			2.87	0.247826	2.86	0.248908
32	8.7	13	0.3	0	1.3		1.41
34	10	14			1.54	0.184615	1.64	0.163121
36	11	15			1.97	0.515385	1.99	0.411348
46	8.7	13	0.3	1	2.42		2.35
48	10	14			2.55	0.053719	2.54	0.0808511
50	11	15			2.89	0.194215	2.89	0.229787
37	8.7	13	0.44	0	1.5		1.52
40	10	14			1.82	0.213333	1.81	0.190789
42	11	15			2.07	0.38	2.12	0.394737
51	8.7	13	0.44	1	2.49		2.5
54	10	14			2.7	0.0843373	2.69	0.076
56	11	15			3	0.204819	2.98	0.192
38	8.7	13	0.74	0	1.82		1.9
41	10	14			2.09	0.148352	2.07	0.0894737
43	11	15			2.41	0.324176	2.45	0.289474
52	8.7	13	0.74	1	2.81		2.83
55	10	14			2.97	0.0569395	2.96	0.0459364
57	11	15			3.23	0.149466	3.32	0.173145
53	8.7	13	0.98	1	3		3.01
58	11	15			3.45	0.15	3.51	0.166113
					Mean	0.227483	Mean	0.214044
					SD	0.152848	SD	0.132614
Case	SWHo (m)	SWPo (s)	SLR (m)	Storm surge (m)	WLs at degraded reef (m)	Effect of sea-level rise to WLs at degraded reef (%)*	WLs at healthy reef (m)	Effect of sea-level rise to WLs at healthy reef (%)*
Effect of sea level rise
30	8.7	13	0	0	-		0.86
31			0.24		1.19		1.24	0.44186
32			0.3		1.3	0.092437	1.41	0.639535
37			0.44		1.5	0.260504	1.52	0.767442
38			0.74		1.82	0.529412	1.9	1.2093
39			0.98		2.06	0.731092	2.12	1.46512
44	8.7	13	0	1	-		2.1
45			0.24		2.3		2.29	0.0904762
46			0.3		2.42	0.0521739	2.35	0.119048
51			0.44		2.49	0.0826087	2.5	0.190476
52			0.74		2.81	0.221739	2.83	0.347619
53			0.98		3	0.304348	3.01	0.433333
33	10	14	0.24	0	1.58		1.55
34			0.3		1.54	-0.0253165	1.64	0.0580645
40			0.44		1.82	0.151899	1.81	0.167742
41			0.74		2.09	0.322785	2.07	0.335484
47	10	14	0.24	1	2.44		2.53
48			0.3		2.55	0.045082	2.54	0.00395257
54			0.44		2.7	0.106557	2.69	0.0632411
55			0.74		2.97	0.217213	2.96	0.16996
35	11	15	0.24	0	1.87		1.9
36			0.3		1.97	0.0534759	1.99	0.0473684
42			0.44		2.07	0.106952	2.12	0.115789
43			0.74		2.41	0.28877	2.45	0.289474
49	11	15	0.24	1	2.87		2.86
50			0.3		2.89	0.00696864	2.89	0.0104895
56			0.44		3	0.0452962	2.98	0.041958
57			0.74		3.23	0.125436	3.32	0.160839
58			0.98		3.45	0.202091	3.51	0.227273
					Mean	0.186739	Mean	0.321558
					SD	0.180977	SD	0.378216
Case	SWHo (m)	SWPo (s)	SLR (m)	Storm surge (m)	WLs at degraded reef (m)	Effect of storm surge to WLs at degraded reef (%)*	WLs at healthy reef (m)	Effect of storm surge to WLs at healthy reef (%)*
Effect of storm surge
30	8.7	13	0	0	-		0.86
44				1	-		2.1	1.44186
31	8.7	13	0.24	0	1.19		1.24
45				1	2.3	0.932773	2.29	0.846774
32	8.7	13	0.3	0	1.3		1.41
46				1	2.42	0.861538	2.35	0.666667
33	10	14	0.24	0	1.58		1.55
47				1	2.44	0.544304	2.53	0.632258
34	10	14	0.3	0	1.54		1.64
48				1	2.55	0.655844	2.54	0.54878
35	11	15	0.24	0	1.87		1.9
49				1	2.87	0.534759	2.86	0.505263
36	11	15	0.3	0	1.97		1.99
50				1	2.89	0.467005	2.89	0.452261
37	8.7	13	0.44	0	1.5		1.52
51				1	2.49	0.66	2.5	0.644737
38	8.7	13	0.74	0	1.82		1.9
52				1	2.81	0.543956	2.83	0.489474
39	8.7	13	0.98	0	2.06		2.12
53				1	3	0.456311	3.01	0.419811
40	10	14	0.44	0	1.82		1.81
54				1	2.7	0.483516	2.69	0.486188
41	10	14	0.74	0	2.09		2.07
55				1	2.97	0.421053	2.96	0.429952
42	11	15	0.44	0	2.07		2.12
56				1	3	0.449275	2.98	0.40566
43	11	15	0.74	0	2.41		2.45
57				1	3.23	0.340249	3.32	0.355102
					Mean	0.56543	Mean	0.594628
					SD	0.171982	SD	0.276577
SWHo: significant wave height at outer ocean
SWPo: significant wave period at outer ocean
SLR: sea level rise, based on RCP scenarios 2.6 and 8.5 (Church et al., 2013)
SWHr: significant wave height at reef flat
The tide is 0.80 m above present mean sea level (i.e., high tide).
* The value is relative to a base value which is shown in bold
